# Supplementary material
Source: publisher figshare collection journal article supplement (https://aacr.figshare.com/articles/dataset/_/22430100)

Uncut gels in Figure 1.

F

$\beta$ -actin

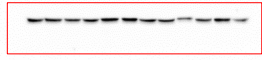

G

$\beta$ -actin

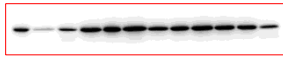

$\beta$ -actin

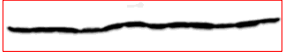

IL-8

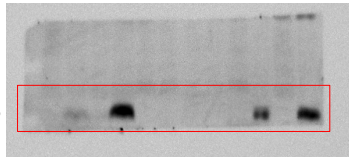

IL-8

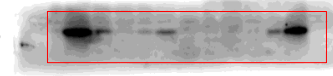

IL-8

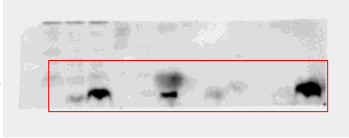

Uncut gels in Figure 2.

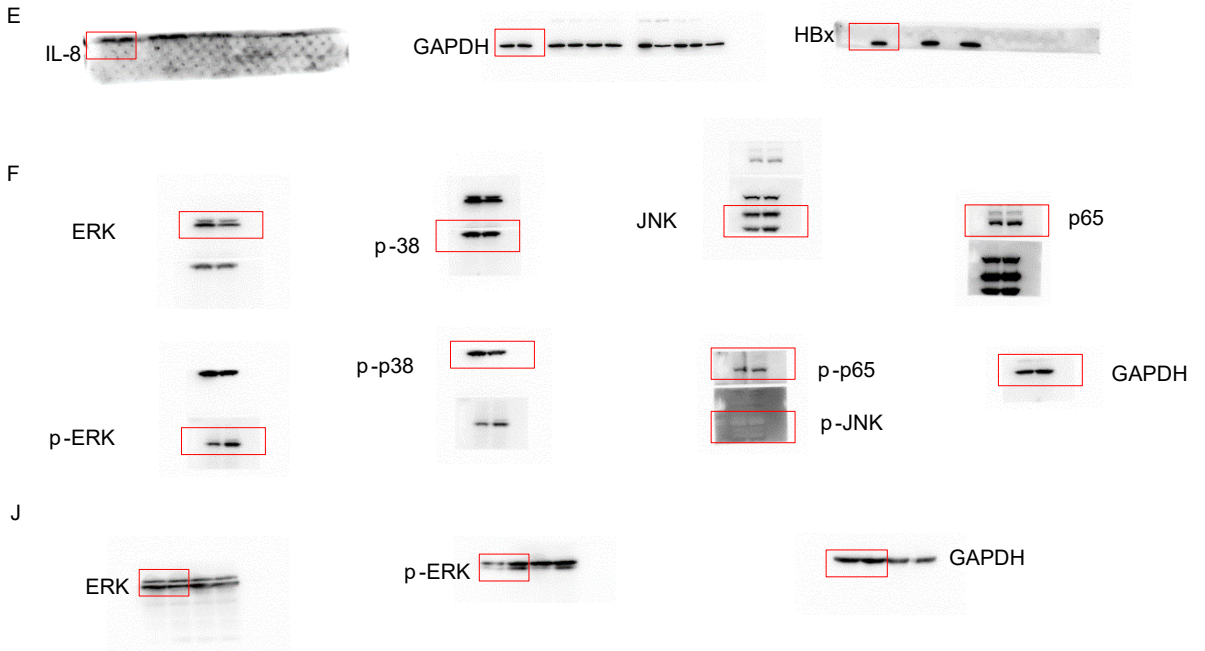

Uncut gels in Figure 3.

H

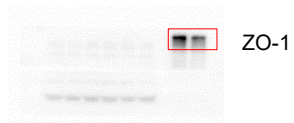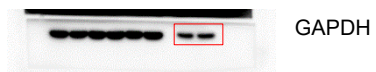

I

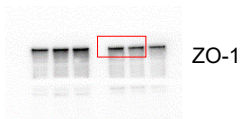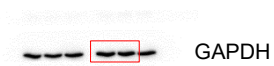

Uncut gels in Figure 6.

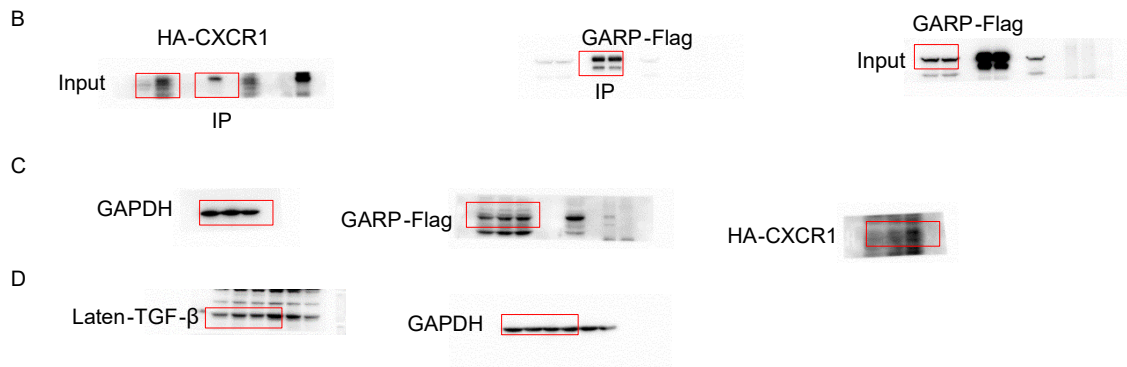

Supplement: Supplementary file 1 [file 39876432]
